# Supplementary material for: Discordant results of Xpert MTB/Rif assay and BACTEC MGIT 960 liquid culture to detect Mycobacterium tuberculosis in community screening in Vietnam
Source: Springer Nature journal article supplement (doi:10.1186/s12879-022-07481-5), 2022-05-31
Supplement: MOESM1 [file 23112506]

**Table S1. Number of participants with discordant and concordant test results, categorized by factors included in the multivariate analysis.**

| <b>Factors</b>                       | <b>Xpert(+)MGIT(-)</b><br>n (%) | <b>Xpert(-)MGIT(+)</b><br>n (%) | <b>Xpert(+)MGIT(+)</b><br>n (%) | <b>Xpert(-)MGIT(-)</b><br>n (%) |
|--------------------------------------|---------------------------------|---------------------------------|---------------------------------|---------------------------------|
| <b>Sex</b>                           |                                 |                                 |                                 |                                 |
| <i>Male</i>                          | 65 (89.0%)                      | 58 (71.6%)                      | 123 (75.5%)                     | 2613 (60.3%)                    |
| <i>Female</i>                        | 8 (11.0%)                       | 23 (28.4%)                      | 40 (24.5%)                      | 1719 (39.7%)                    |
| <b>Night sweats <sup>a</sup></b>     |                                 |                                 |                                 |                                 |
| <i>Yes</i>                           | 10 (13.7%)                      | 2 (2.5%)                        | 9 (5.5%)                        | 268 (6.2%)                      |
| <i>No</i>                            | 63 (86.3%)                      | 79 (97.5%)                      | 154 (94.5%)                     | 4032 (93.8%)                    |
| <b>Productive cough <sup>a</sup></b> |                                 |                                 |                                 |                                 |
| <i>Yes</i>                           | 38 (80.9%)                      | 44 (86.3%)                      | 111 (93.3%)                     | 2951 (68.1%)                    |
| <i>No</i>                            | 9 (19.1%)                       | 7 (13.7%)                       | 8 (6.7%)                        | 1381 (31.9%)                    |
| <b>Chest X-ray <sup>a</sup></b>      |                                 |                                 |                                 |                                 |
| <i>Abnormal</i>                      | 72 (98.6%)                      | 76 (93.8%)                      | 160 (98.2%)                     | 2239 (51.9%)                    |
| <i>Normal</i>                        | 1 (1.4%)                        | 5 (6.2%)                        | 3 (1.8%)                        | 2078 (48.1%)                    |
| <b>Treatment history</b>             |                                 |                                 |                                 |                                 |
| <i>No treatment history</i>          | 60 (82.2%)                      | 76 (93.8%)                      | 147 (90.2%)                     | 3612 (83.4%)                    |
| <i>TB treatment &gt; 2 years</i>     | 13 (17.8%)                      | 5 (6.2%)                        | 16 (9.8%)                       | 720 (16.6%)                     |
| <b>Area</b>                          |                                 |                                 |                                 |                                 |
| <i>North</i>                         | 37 (50.7%)                      | 28 (34.6%)                      | 47 (28.8%)                      | 1374 (31.7%)                    |
| <i>Central</i>                       | 9 (12.3%)                       | 19 (25.5%)                      | 25 (15.3%)                      | 1022 (23.6%)                    |
| <i>South</i>                         | 27 (37.0%)                      | 34 (42.0%)                      | 91 (55.9%)                      | 1936 (44.7%)                    |
| <b>Culture laboratory</b>            |                                 |                                 |                                 |                                 |
| <i>National Referral Lab</i>         | 19 (26.0%)                      | 28 (34.6%)                      | 51 (31.3%)                      | 1820 (42.0%)                    |
| <i>Da Nang</i>                       | 10 (13.7%)                      | 7 (8.6%)                        | 18 (11.0%)                      | 443 (10.2%)                     |
| <i>Pham Ngoc Thach</i>               | 21 (28.8%)                      | 31 (38.3%)                      | 52 (31.9%)                      | 1169 (27.0%)                    |
| <i>Can Tho</i>                       | 23 (31.5%)                      | 15 (18.5%)                      | 42 (25.8%)                      | 900 (20.8%)                     |

<sup>a</sup> Participants who did not report symptoms or underwent chest X-ray examination were omitted.
